# Supplementary material for: Genomic Diversity of Listeria monocytogenes Isolated from Clinical and Non-Clinical Samples in Chile
Source: MDPI journal article supplement (doi:10.3390/genes9080396), 2018-08-02
Supplement: s1 [file s1]

**Table S2.** *L. monocytogenes* used as references in the core genome alignment for lineage determination.

| Isolate name    | Country | Source      | Collection Date | Serotype | Lineage | Clonal complex (CC) | Sequence-type (ST) | Genbank Accession no. |
|-----------------|---------|-------------|-----------------|----------|---------|---------------------|--------------------|-----------------------|
| 07PF0776        | USA     | Human       | 2011            | 4b       | I       | CC4                 | ST4                | CP003414.1            |
| 08-5578         | Canada  | Human       | 2008            | 1/2a     | II      | CC121               | ST121              | CP001602.2            |
| 08-5923         | Canada  | Human       | 2008            | 1/2a     | II      | CC121               | ST121              | CP001604.1            |
| 6179            | Ireland | Cheese      | 2014            | 1/2a     | II      | CC121               | ST121              | HG813249.1            |
| 10403S          | USA     | Human       | 1964            | 1/2a     | II      | CC7                 | ST85               | CP002002.1            |
| ATCC 19117      | N/A     | Sheep       | N/D             | 4d       | I       | CC2                 | ST2                | FR733643              |
| C1-387          | USA     | Food        | 1999            | 1/2a     | II      | -                   | -                  | CP006591.1            |
| CFSAN006122     | USA     | Cheese      | 2013            | N/A      | I       | CC6                 | ST6                | CP007600.1            |
| CFSAN007956     | USA     | N/A         | N/D             | N/A      | II      | CC37                | ST37               | CP011397.1            |
| CFSAN008100     | USA     | Green chile | N/A             | N/A      | I       | CC5                 | ST5                | CP011398              |
| CFSAN023463     | USA     | Peaches     | 2014            | N/A      | -       | N/D                 | N/D                | CP012021.1            |
| CLIP80459       | N/A     | N/A         | 2013            | 4b       | I       | -                   | -                  | FM242711.1            |
| EGD-e           | UK      | Guinea pig  | 1926            | 1/2a     | II      | CC9                 | ST35               | AL591824.1            |
| EGD             | UK      | Guinea pig  | 1926            | 1/2a     | II      | CC7                 | ST12               | HG421741.1            |
| F23654b         | USA     | Cheese      | 1985            | 4b       | I       | CC1                 | ST1                | AE017262.2            |
| Finland1998     | Finland | Butter      | 1998            | 3a       | II      | CC155               | ST155              | CP002004.1            |
| FSLR2-561       | USA     | Human       | N/D             | 1/2c     | II      | CC9                 | ST122              | CP002003.1            |
| HCC23           | USA     | Animal      | N/A             | 4a       | III     | -                   | -                  | CP001175.1            |
| IZSAM_Lm_hs2008 | Italy   | Human       | 2009            | 4b       | I       | -                   | -                  | CP010346              |
| J0 161          | USA     | Human       | 2000            | 1/2a     | II      | CC11                | ST11               | CP002001.1            |
| J1 220          | USA     | Human       | N/A             | 4b       | I       | -                   | -                  | CP006046.2            |
| J1 776          | USA     | Human       | 2002            | 4b       | I       | CC6                 | ST6                | CP006598.1            |
| J1 816          | USA     | Food        | 2002            | 4b       | I       | -                   | -                  | CP006047.2            |
| J1 817          | USA     | Environment | 2002            | 4b       | I       | CC6                 | ST6                | CP006599.1            |
| J1 926          | USA     | Food        | 2002            | 4b       | I       | CC6                 | ST6                | CP006600.1            |
| J2 031          | USA     | Human       | 1996            | 1/2a     | II      | CC415               | ST394              | CP006593.1            |
| J2 064          | USA     | Animal      | 1989            | 1/2b     | I       | -                   | -                  | CP006592.1            |
| J1 108          | Canada  | Coleslaw    | 1981            | 4b       | I       | -                   | -                  | CP006596.1            |
| L1846           | USA     | Human       | 2009            | 1/2b     | I       | -                   | -                  | CP007688              |

|           |             |             |      |      |     |       |        |            |
|-----------|-------------|-------------|------|------|-----|-------|--------|------------|
| L2074     | USA         | Human       | 2010 | 1/2a | II  | -     | -      | CP007689   |
| L2624     | USA         | Human       | 2011 | 1/2b | I   | -     | -      | CP007686.1 |
| L2625     | USA         | Human       | 2011 | 1/2a | II  |       | ST29   | CP007687.1 |
| L2626     | USA         | Cantaloupe  | 2011 | 1/2a | II  | CC7   | ST561  | CP007684.1 |
| L2676     | USA         | Human       | 2011 | 1/2a | II  | CC7   | ST7    | CP007685   |
| L312      | N/A         | Cheese      | N/A  | 4b   | I   | CC4   | ST4    | FR733642.2 |
| L99       | Netherlands | Cheese      | 195  | 4a   | III | -     | ST-201 | FM211688   |
| LL195     | Switzerland | Human       | 2013 | 4b   | I   | -     | -      | HF558398.1 |
| Lm60      | Switzerland | Human       | 2006 | 1/2a | II  |       | ST551  | CP009258.1 |
| Lm850658  | Australia   | Sheep       | 1985 | 4b   | -   | -     | -      | CP009242.1 |
| M7        | China       | Milk        | N/A  | 4a   | III | -     | -      | CP002816.1 |
| N1-011A   | USA         | Environment | N/A  | 1/2b | I   | -     | -      | CP006597.1 |
| N2306     | Switzerland | Human       | 2014 | 4b   | I   | CC4   | ST4    | CP011004.1 |
| NTSN      | China       | Sheep       | 2011 | -    | -   | -     | -      | CP009897.1 |
| R2 502    | USA         | Food        | 1994 | 1/2b | I   | CC3   | ST3    | CP006594.1 |
| R479a     | Dinamarca   | Salmon      | 1996 | 1/2a | II  | CC8   | ST8    | HG813247.1 |
| SLCC2372  | Reino unido | Human       | 1935 | 1/2c | II  | CC9   | ST122  | FR733648.1 |
| SLCC 2376 | N/A         | Chicken     | N/A  | 4c   | III | CC131 | ST71   | FR733651.1 |
| SLCC 2378 | N/A         | Chicken     | N/A  | 4e   | I   | CC1   | ST73   | FR733644.1 |
| SLCC 2479 | N/A         | N/A         | 1966 | 3c   | II  | CC9   | ST9    | FR733649.1 |
| SLCC 2540 | USA         | Human       | 1956 | 3b   | I   | -     | -      | FR733645.1 |
| SLCC 2755 | N/A         | Chinchilla  | 1927 | 1/2b | I   | CC3   | ST66   | FR733646.1 |
| SLCC 5850 | UK          | Rabbit      | 1924 | 1/2a | II  | CC7   | ST12   | FR733647.1 |
| SLCC 7179 | Austria     | Cheese      | 1986 | 3a   | II  | CC14  | ST91   | FR733650.1 |
| WSLC1001  | Germany     | N/A         | N/A  | 1/2a | II  | -     | -      | CP007160.1 |
| WSLC1042  | Germany     | N/A         | N/A  | 4b   | I   | -     | -      | CP007210.1 |

N/A not available

2  
3  
4  
5
