# Supplementary material for: Genomic Diversity of Listeria monocytogenes Isolated from Clinical and Non-Clinical Samples in Chile
Source: MDPI journal article supplement (doi:10.3390/genes9080396), 2018-08-02
Supplement: s1 [file s1]

**Table S1.** Sequencing statistics of 38 isolates of *L. monocytogenes* obtained from clinical and non-clinical samples and sequenced in this study.

| Isolate | GC content | Number of CDS | Genome size (Mbp) | Contigs | N50     | Genbank accession no. |
|---------|------------|---------------|-------------------|---------|---------|-----------------------|
| T1-001  | 37.9       | 3071          | 3.05              | 20      | 429,602 | PVUO00000000          |
| T1-002  | 37.9       | 2917          | 2.91              | 20      | 477,812 | PVUP00000000          |
| T1-003  | 37.8       | 2918          | 2.92              | 12      | 579,709 | PVUQ00000000          |
| T1-004  | 37.9       | 2964          | 2.97              | 21      | 501,516 | PVUR00000000          |
| T1-005  | 37.9       | 3107          | 3.10              | 26      | 516,487 | PVUS00000000          |
| T1-006  | 37.8       | 2882          | 2.91              | 22      | 477,225 | PVUT00000000          |
| T1-007  | 37.8       | 3084          | 3.07              | 61      | 237,958 | PVUU00000000          |
| T1-008  | 37.9       | 2935          | 2.95              | 24      | 481,271 | PVUV00000000          |
| T1-009  | 37.9       | 2985          | 2.98              | 27      | 381,601 | PVUW00000000          |
| T1-010  | 37.8       | 2987          | 2.99              | 21      | 600,094 | PVUX00000000          |
| T1-011  | 37.9       | 2921          | 2.92              | 14      | 438,610 | PVUY00000000          |
| T1-012  | 37.9       | 2989          | 3.03              | 16      | 511,024 | PVUZ00000000          |
| T1-013  | 37.9       | 3107          | 3.10              | 30      | 516,391 | PVVA00000000          |
| T1-014  | 37.9       | 3049          | 3.04              | 19      | 448,549 | PVVB00000000          |
| T1-016  | 37.9       | 2893          | 2.92              | 24      | 514,953 | PVVC00000000          |
| T1-017  | 37.9       | 3073          | 3.02              | 27      | 434,210 | PVVD00000000          |
| T1-018  | 37.8       | 2891          | 2.92              | 24      | 514,953 | PVVE00000000          |
| T1-019  | 37.8       | 2893          | 2.92              | 21      | 514,952 | PVVF00000000          |
| T1-020  | 37.9       | 3002          | 3.01              | 22      | 522,776 | PVVG00000000          |
| T1-022  | 37.8       | 2819          | 2.87              | 23      | 521,710 | PVVH00000000          |
| T1-023  | 37.9       | 2857          | 2.90              | 22      | 517,387 | PVVI00000000          |
| T1-024  | 37.9       | 2874          | 2.91              | 24      | 300,180 | PVVJ00000000          |
| T1-025  | 37.8       | 2875          | 2.91              | 22      | 295,002 | PVVK00000000          |
| T1-026  | 37.8       | 2998          | 2.99              | 29      | 477,703 | PVVL00000000          |
| T1-027  | 37.8       | 2915          | 2.91              | 14      | 502,192 | PVVM00000000          |
| T1-028  | 37.9       | 2818          | 2.87              | 24      | 521,505 | PVVN00000000          |
| T1-029  | 37.9       | 2952          | 2.99              | 19      | 331,006 | PVVO00000000          |
| T1-030  | 37.9       | 2919          | 2.96              | 25      | 341,851 | PVVP00000000          |
| T1-031  | 37.9       | 2939          | 2.95              | 29      | 381,659 | PVVQ00000000          |
| T1-033  | 37.9       | 2917          | 3.10              | 23      | 520,563 | PVVR00000000          |
| T1-034  | 37.8       | 3087          | 3.09              | 36      | 436,191 | PVVS00000000          |
| T1-037  | 37.9       | 2811          | 2.84              | 19      | 450,121 | PVVT00000000          |
| T1-038  | 37.8       | 3053          | 3.06              | 18      | 563,450 | PVVU00000000          |
| T1-039  | 38.0       | 3052          | 3.04              | 42      | 254,269 | PVVV00000000          |
| T1-040  | 37.8       | 3008          | 3.10              | 19      | 477,705 | PVVW00000000          |
| T1-041  | 37.9       | 3100          | 3.09              | 35      | 480,494 | PVVX00000000          |
| T1-042  | 37.9       | 2879          | 2.91              | 24      | 295,002 | PVVY00000000          |
| T1-043  | 37.9       | 2884          | 2.91              | 21      | 521,711 | PVVZ00000000          |
