# Supplementary material for: Genomic Diversity of Listeria monocytogenes Isolated from Clinical and Non-Clinical Samples in Chile
Source: Genes (Basel). 2018 Aug 2;9(8):396. doi: 10.3390/genes9080396 (PMC6115834; doi:10.3390/genes9080396)
Supplement: Supplementary file 1 [file genes-09-00396-s001.zip]

Archive with 6 entries (6 files):
- FigureS1.pdf
- FigureS2.pdf
- FigureS3.pdf
- Table S3.xlsx
- TableS1.pdf
- TableS2.pdf
