# Supplementary material for: Genomic Diversity of Listeria monocytogenes Isolated from Clinical and Non-Clinical Samples in Chile
Source: Genes (Basel). 2018 Aug 2;9(8):396. doi: 10.3390/genes9080396 (PMC6115834; doi:10.3390/genes9080396)
Supplement: Supplementary file 1 [file genes-09-00396-s001.zip › Table S3.xlsx]

## Sheet: Hoja1
Table S3. Pairwise distance matrix of SNP number differences for 15 chilean isolates of L. monocytogenes clustered in CC1.
	T1-006	T1-007	T1-008	T1-009	T1-010	T1-022	T1-023	T1-024	T1-025	T1-028	T1-031	T1-033	T1-041	T1-042	T1-043	F2365 (reference)
T1-006	0	121	90	57	65	101	187	106	108	101	92	181	117	109	89	174
T1-007	121	0	119	126	124	130	198	99	97	129	123	188	50	98	116	183
T1-008	90	119	0	97	93	59	187	108	106	59	50	179	115	105	37	172
T1-009	57	126	97	0	70	108	192	113	115	108	99	186	122	116	94	181
T1-010	65	124	93	70	0	104	190	111	111	104	95	184	118	112	92	177
T1-022	101	130	59	108	104	0	196	115	119	24	43	190	126	120	58	183
T1-023	187	198	187	192	190	196	0	187	185	196	189	186	193	186	186	175
T1-024	106	99	108	113	111	115	187	0	18	121	112	179	91	19	107	172
T1-025	108	97	106	115	111	119	185	18	0	119	110	177	93	17	105	170
T1-028	101	129	59	108	104	24	196	121	119	0	43	190	128	120	58	183
T1-031	92	123	50	99	95	43	189	112	110	43	0	183	119	111	49	176
T1-033	181	188	179	186	184	190	186	179	177	190	183	0	186	178	176	133
T1-041	117	50	115	122	118	126	193	91	93	128	119	186	0	94	114	179
T1-042	109	98	105	116	112	120	186	19	17	120	111	178	94	0	106	171
T1-043	89	116	37	94	92	58	186	107	105	58	49	176	114	106	0	171
F2365 (reference)	174	183	172	181	177	183	175	172	170	183	176	133	179	171	171	0
min: 17 max: 198
